# Supplementary material
Source: publisher figshare collection journal article supplement (https://acs.figshare.com/ndownloader/files/3590919)

Supporting information:

## **Support Shape Effect in Metal Oxide Catalysis: Ceria Nanoshapes Supported Vanadia Catalysts for Oxidative Dehydrogenation of Isobutane**

Zili Wu,<sup>\*a,b</sup> Viviane Schwartz,<sup>\*a</sup> Meijun Li,<sup>b</sup> Adam J. Rondinone,<sup>a</sup> and Steven H. Overbury<sup>a,b</sup>

<sup>a</sup> Center for Nanophase Materials Sciences; <sup>b</sup> Chemical Science Division; Oak Ridge National Laboratory, Oak Ridge, TN 37831. Wu ZL: Tel: 01-865-576-1080, E-mail: [wuzl@ornl.gov](mailto:wuzl@ornl.gov); Schwartz V.: Tel: 01-865-576-6749, E-mail: [Schwartzv@ornl.gov](mailto:Schwartzv@ornl.gov)

Figure S1. Room temperature visible ( $\lambda = 632.8\text{nm}$ ) Raman spectra of 2V/r-CeO<sub>2</sub> (red spectra) and 2V/o-CeO<sub>2</sub> (black spectra) before (solid line) and after (dash line) isobutane ODH at 673 K. The weak bands at 995 and 975 cm<sup>-1</sup> for 2V/r-CeO<sub>2</sub> are due to slightly hydrated VO<sub>x</sub> species, see ref <sup>1</sup> for more information. Peaks marked with “\*” denote plasma line from the laser and peaks with “+” represent trace phosphate species on o-CeO<sub>2</sub>.

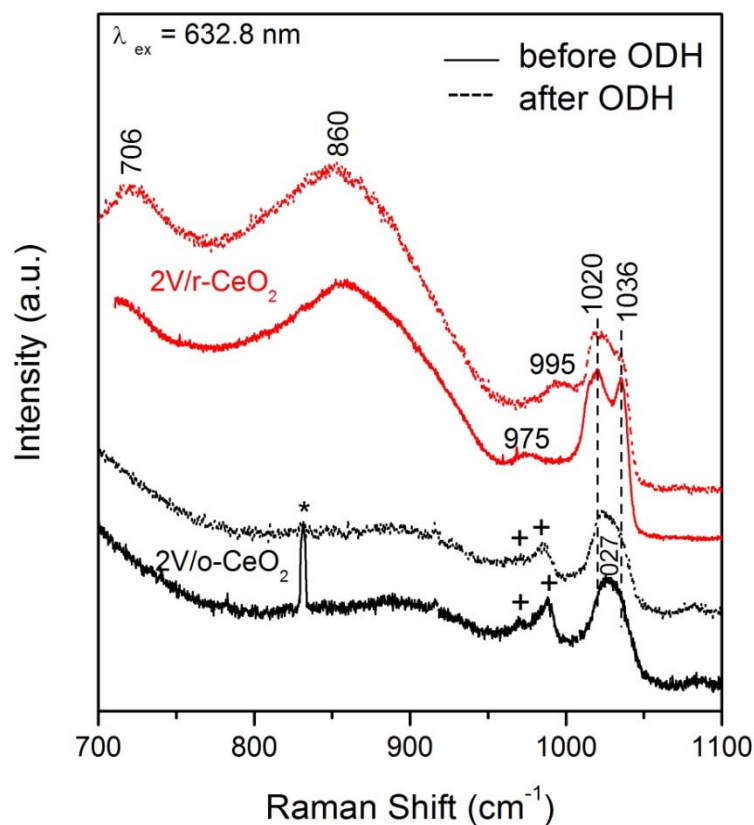

Figure S2. TEM image of 2V/r-CeO<sub>2</sub> and SEM image of 2V/o-CeO<sub>2</sub>. Both samples are post 673 K isobutane ODH.

2V/r-CeO<sub>2</sub> after 673 K iso-butane ODH

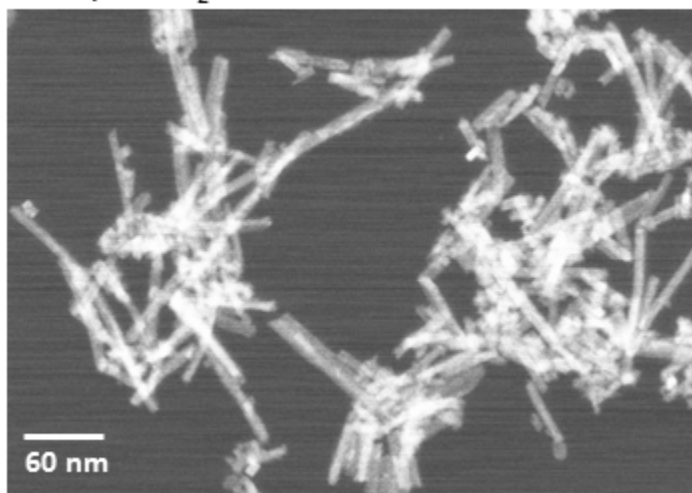

2V/o-CeO<sub>2</sub> after 673 K iso-butane ODH

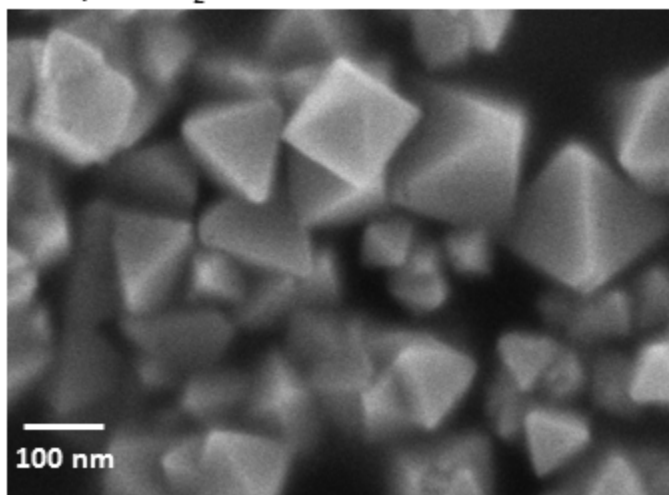

Supplement: Supplementary file 1 [file 3590919]
